# Supplementary material for: Disentangling the Drivers of Obesity: An Analytical Framework Based on Socioeconomic and Intrapersonal Factors
Source: Frontiers journal article supplement (doi:10.3389/fnut.2021.585318), 2021-03-03
Supplement: Presentation_1.pdf [file Presentation_1.pdf]

## Appendix A: Attitudes Toward Obese Persons Scale (ATOP)

Please mark each statement below in the left margin, according to how much you agree or disagree with it. Please do not leave any blank. Use the numbers on the following scale to indicate your response. Be sure to place a minus or plus sign ( - or +) beside the number that you choose to show whether you agree or disagree.

| -3                  | -2                    | -1                  | +1               | +2                 | +3               |
|---------------------|-----------------------|---------------------|------------------|--------------------|------------------|
| I strongly disagree | I moderately disagree | I slightly disagree | I slightly agree | I moderately agree | I strongly agree |

1. \_\_\_\_\_ Obese people are as happy as nonobese people.
2. \_\_\_\_\_ Most obese people feel that they are not as good as other people.
3. \_\_\_\_\_ Most obese people are more self-conscious than other people.
4. \_\_\_\_\_ Obese workers cannot be as successful as other workers.
5. \_\_\_\_\_ Most nonobese people would not want to marry anyone who is obese.
6. \_\_\_\_\_ Severely obese people are usually untidy.
7. \_\_\_\_\_ Obese people are usually sociable.
8. \_\_\_\_\_ Most obese people are not dissatisfied with themselves.
9. \_\_\_\_\_ Obese people are just as self-confident as other people.
10. \_\_\_\_\_ Most people feel uncomfortable when they associate with obese people.
11. \_\_\_\_\_ Obese people are often less aggressive than nonobese people.
12. \_\_\_\_\_ Most obese people have different personalities than nonobese people.
13. \_\_\_\_\_ Very few obese people are ashamed of their weight.
14. \_\_\_\_\_ Most obese people resent normal weight people.
15. \_\_\_\_\_ Obese people are more emotional than nonobese people.
16. \_\_\_\_\_ Obese people should not expect to lead normal lives.
17. \_\_\_\_\_ Obese people are just as healthy as nonobese people.
18. \_\_\_\_\_ Obese people are just as sexually attractive as nonobese people.
19. \_\_\_\_\_ Obese people tend to have family problems.
20. \_\_\_\_\_ One of the worst things that could happen to a person would be for him to become obese.

## Appendix B: Beliefs About Obese Persons Scale (BAOP)

Please mark each statement below in the left margin, according to how much you agree or disagree with it. Please do not leave any blank. Use the numbers on the following scale to indicate your response. Be sure to place a minus or plus sign ( - or +) beside the number that you choose to show whether you agree or disagree.

| -3                  | -2                    | -1                  | +1               | +2                 | +3               |
|---------------------|-----------------------|---------------------|------------------|--------------------|------------------|
| I strongly disagree | I moderately disagree | I slightly disagree | I slightly agree | I moderately agree | I strongly agree |

1. \_\_\_\_\_ Obesity often occurs when eating is used as a form of compensation for lack of love or attention.
2. \_\_\_\_\_ In many cases, obesity is the result of a biological disorder.
3. \_\_\_\_\_ Obesity is usually caused by overeating.
4. \_\_\_\_\_ Most obese people cause their problem by not getting enough exercise.
5. \_\_\_\_\_ Most obese people eat more than nonobese people.
6. \_\_\_\_\_ The majority of obese people have poor eating habits that lead to their obesity.
7. \_\_\_\_\_ Obesity is rarely caused by a lack of willpower.
8. \_\_\_\_\_ People can be addicted to food, just as others are addicted to drugs, and these people usually become obese.

Allison, D.B., Basile, V.C., and Yucker, H. E. (1991). The measurement of attitudes toward and beliefs about obese persons. *International Journal of Eating Disorders*, 10, 599-607.

## Appendix C: Experimental Lotteries to Risk attitudes

| Series 1 | Plan A                               | Plan B                                     |
|----------|--------------------------------------|--------------------------------------------|
| 1        | 4€ Yes ① ② ③<br>1€ Yes ④ ⑤ ⑥ ⑦ ⑧ ⑨ ⑩ | 6,8€ Yes ①<br>0,5€ Yes ② ③ ④ ⑤ ⑥ ⑦ ⑧ ⑨ ⑩   |
| 2        | 4€ Yes ① ② ③<br>1€ Yes ④ ⑤ ⑥ ⑦ ⑧ ⑨ ⑩ | 7,5€ Yes ①<br>0,5€ Yes ② ③ ④ ⑤ ⑥ ⑦ ⑧ ⑨ ⑩   |
| 3        | 4€ Yes ① ② ③<br>1€ Yes ④ ⑤ ⑥ ⑦ ⑧ ⑨ ⑩ | 8,3€ Yes ①<br>0,5€ Yes ② ③ ④ ⑤ ⑥ ⑦ ⑧ ⑨ ⑩   |
| 4        | 4€ Yes ① ② ③<br>1€ Yes ④ ⑤ ⑥ ⑦ ⑧ ⑨ ⑩ | 9,3€ Yes ①<br>0,5€ Yes ② ③ ④ ⑤ ⑥ ⑦ ⑧ ⑨ ⑩   |
| 5        | 4€ Yes ① ② ③<br>1€ Yes ④ ⑤ ⑥ ⑦ ⑧ ⑨ ⑩ | 10,6€ Yes ①<br>0,5€ Yes ② ③ ④ ⑤ ⑥ ⑦ ⑧ ⑨ ⑩  |
| 6        | 4€ Yes ① ② ③<br>1€ Yes ④ ⑤ ⑥ ⑦ ⑧ ⑨ ⑩ | 12,5€ Yes ①<br>0,5€ Yes ② ③ ④ ⑤ ⑥ ⑦ ⑧ ⑨ ⑩  |
| 7        | 4€ Yes ① ② ③<br>1€ Yes ④ ⑤ ⑥ ⑦ ⑧ ⑨ ⑩ | 15,0€ Yes ①<br>0,5€ Yes ② ③ ④ ⑤ ⑥ ⑦ ⑧ ⑨ ⑩  |
| 8        | 4€ Yes ① ② ③<br>1€ Yes ④ ⑤ ⑥ ⑦ ⑧ ⑨ ⑩ | 18,5€ Yes ①<br>0,5€ Yes ② ③ ④ ⑤ ⑥ ⑦ ⑧ ⑨ ⑩  |
| 9        | 4€ Yes ① ② ③<br>1€ Yes ④ ⑤ ⑥ ⑦ ⑧ ⑨ ⑩ | 22,0€ Yes ①<br>0,5€ Yes ② ③ ④ ⑤ ⑥ ⑦ ⑧ ⑨ ⑩  |
| 10       | 4€ Yes ① ② ③<br>1€ Yes ④ ⑤ ⑥ ⑦ ⑧ ⑨ ⑩ | 30,0€ Yes ①<br>0,5€ Yes ② ③ ④ ⑤ ⑥ ⑦ ⑧ ⑨ ⑩  |
| 11       | 4€ Yes ① ② ③<br>1€ Yes ④ ⑤ ⑥ ⑦ ⑧ ⑨ ⑩ | 40,0€ Yes ①<br>0,5€ Yes ② ③ ④ ⑤ ⑥ ⑦ ⑧ ⑨ ⑩  |
| 12       | 4€ Yes ① ② ③<br>1€ Yes ④ ⑤ ⑥ ⑦ ⑧ ⑨ ⑩ | 60,0€ Yes ①<br>0,5€ Yes ② ③ ④ ⑤ ⑥ ⑦ ⑧ ⑨ ⑩  |
| 13       | 4€ Yes ① ② ③<br>1€ Yes ④ ⑤ ⑥ ⑦ ⑧ ⑨ ⑩ | 100,0€ Yes ①<br>0,5€ Yes ② ③ ④ ⑤ ⑥ ⑦ ⑧ ⑨ ⑩ |
| 14       | 4€ Yes ① ② ③<br>1€ Yes ④ ⑤ ⑥ ⑦ ⑧ ⑨ ⑩ | 170,0€ Yes ①<br>0,5€ Yes ② ③ ④ ⑤ ⑥ ⑦ ⑧ ⑨ ⑩ |
|          | I choose Plan A for Questions 1-     | I choose Plan B for Questions ____ -14     |
| Series 2 | Plan A                               | Plan B                                     |
| 15       | 4€ Yes ① ② ③ ④ ⑤ ⑥ ⑦ ⑧ ⑨<br>3€ Yes ⑩ | 5,4€ Yes ① ② ③ ④ ⑤ ⑥ ⑦<br>0,5€ Yes ⑧ ⑨ ⑩   |
| 16       | 4€ Yes ① ② ③ ④ ⑤ ⑥ ⑦ ⑧ ⑨<br>3€ Yes ⑩ | 5,6€ Yes ① ② ③ ④ ⑤ ⑥ ⑦<br>0,5€ Yes ⑧ ⑨ ⑩   |
| 17       | 4€ Yes ① ② ③ ④ ⑤ ⑥ ⑦ ⑧ ⑨<br>3€ Yes ⑩ | 5,8€ Yes ① ② ③ ④ ⑤ ⑥ ⑦<br>0,5€ Yes ⑧ ⑨ ⑩   |
| 18       | 4€ Yes ① ② ③ ④ ⑤ ⑥ ⑦ ⑧ ⑨<br>3€ Yes ⑩ | 6,0€ Yes ① ② ③ ④ ⑤ ⑥ ⑦<br>0,5€ Yes ⑧ ⑨ ⑩   |
| 19       | 4€ Yes ① ② ③ ④ ⑤ ⑥ ⑦ ⑧ ⑨<br>3€ Yes ⑩ | 6,2€ Yes ① ② ③ ④ ⑤ ⑥ ⑦<br>0,5€ Yes ⑧ ⑨ ⑩   |
| 20       | 4€ Yes ① ② ③ ④ ⑤ ⑥ ⑦ ⑧ ⑨<br>3€ Yes ⑩ | 6,5€ Yes ① ② ③ ④ ⑤ ⑥ ⑦<br>0,5€ Yes ⑧ ⑨ ⑩   |
| 21       | 4€ Yes ① ② ③ ④ ⑤ ⑥ ⑦ ⑧ ⑨<br>3€ Yes ⑩ | 6,8€ Yes ① ② ③ ④ ⑤ ⑥ ⑦<br>0,5€ Yes ⑧ ⑨ ⑩   |
| 22       | 4€ Yes ① ② ③ ④ ⑤ ⑥ ⑦ ⑧ ⑨<br>3€ Yes ⑩ | 7,2€ Yes ① ② ③ ④ ⑤ ⑥ ⑦<br>0,5€ Yes ⑧ ⑨ ⑩   |

|          |                                                    |                                                    |
|----------|----------------------------------------------------|----------------------------------------------------|
| 23       | 4€ Yes ① ② ③ ④ ⑤ ⑥ ⑦ ⑧ ⑨<br>3€ Yes ⑩               | 7,7€ Yes ① ② ③ ④ ⑤ ⑥ ⑦<br>0,5€ Yes ⑧ ⑨ ⑩           |
| 24       | 4€ Yes ① ② ③ ④ ⑤ ⑥ ⑦ ⑧ ⑨<br>3€ Yes ⑩               | 8,3€ Yes ① ② ③ ④ ⑤ ⑥ ⑦<br>0,5€ Yes ⑧ ⑨ ⑩           |
| 25       | 4€ Yes ① ② ③ ④ ⑤ ⑥ ⑦ ⑧ ⑨<br>3€ Yes ⑩               | 9,0€ Yes ① ② ③ ④ ⑤ ⑥ ⑦<br>0,5€ Yes ⑧ ⑨ ⑩           |
| 26       | 4€ Yes ① ② ③ ④ ⑤ ⑥ ⑦ ⑧ ⑨<br>3€ Yes ⑩               | 10,0€ Yes ① ② ③ ④ ⑤ ⑥ ⑦<br>0,5€ Yes ⑧ ⑨ ⑩          |
| 27       | 4€ Yes ① ② ③ ④ ⑤ ⑥ ⑦ ⑧ ⑨<br>3€ Yes ⑩               | 11,0€ Yes ① ② ③ ④ ⑤ ⑥ ⑦<br>0,5€ Yes ⑧ ⑨ ⑩          |
| 28       | 4€ Yes ① ② ③ ④ ⑤ ⑥ ⑦ ⑧ ⑨<br>3€ Yes ⑩               | 13,0€ Yes ① ② ③ ④ ⑤ ⑥ ⑦<br>0,5€ Yes ⑧ ⑨ ⑩          |
|          | I choose Plan A for Questions 15 - ____            | I choose Plan B for Questions ____ - 28            |
| Series 3 | Plan A                                             | Plan B                                             |
| 29       | Gain 2,5€ Yes ① ② ③ ④ ⑤<br>Loss 0,4€ Yes ⑥ ⑦ ⑧ ⑨ ⑩ | Gain 3,0€ Yes ① ② ③ ④ ⑤<br>Loss 2,1€ Yes ⑥ ⑦ ⑧ ⑨ ⑩ |
| 30       | Gain 0,4€ Yes ① ② ③ ④ ⑤<br>Loss 0,4€ Yes ⑥ ⑦ ⑧ ⑨ ⑩ | Gain 3,0€ Yes ① ② ③ ④ ⑤<br>Loss 2,1€ Yes ⑥ ⑦ ⑧ ⑨ ⑩ |
| 31       | Gain 0,1€ Yes ① ② ③ ④ ⑤<br>Loss 0,4€ Yes ⑥ ⑦ ⑧ ⑨ ⑩ | Gain 3,0€ Yes ① ② ③ ④ ⑤<br>Loss 2,1€ Yes ⑥ ⑦ ⑧ ⑨ ⑩ |
| 32       | Gain 0,1€ Yes ① ② ③ ④ ⑤<br>Loss 0,4€ Yes ⑥ ⑦ ⑧ ⑨ ⑩ | Gain 3,0€ Yes ① ② ③ ④ ⑤<br>Loss 1,6€ Yes ⑥ ⑦ ⑧ ⑨ ⑩ |
| 33       | Gain 0,1€ Yes ① ② ③ ④ ⑤<br>Loss 0,8€ Yes ⑥ ⑦ ⑧ ⑨ ⑩ | Gain 3,0€ Yes ① ② ③ ④ ⑤<br>Loss 1,6€ Yes ⑥ ⑦ ⑧ ⑨ ⑩ |
| 34       | Gain 0,1€ Yes ① ② ③ ④ ⑤<br>Loss 0,8€ Yes ⑥ ⑦ ⑧ ⑨ ⑩ | Gain 3,0€ Yes ① ② ③ ④ ⑤<br>Loss 1,4€ Yes ⑥ ⑦ ⑧ ⑨ ⑩ |
| 35       | Gain 0,1€ Yes ① ② ③ ④ ⑤<br>Loss 0,8€ Yes ⑥ ⑦ ⑧ ⑨ ⑩ | Gain 3,0€ Yes ① ② ③ ④ ⑤<br>Loss 1,1€ Yes ⑥ ⑦ ⑧ ⑨ ⑩ |
|          | I choose Plan A for Questions 29 - ____            | I choose Plan B for Questions ____ - 35            |

Switching point (question) in Series 1 and 2, and approximations of  $\sigma$  (risk parameter)

| $\sigma$ | Switching point for series 1 |      |      |      |      |      |      |      |      |      |      |      |      |      |       |
|----------|------------------------------|------|------|------|------|------|------|------|------|------|------|------|------|------|-------|
| Series   | 1                            | 2    | 3    | 4    | 5    | 6    | 7    | 8    | 9    | 10   | 11   | 12   | 13   | 14   | Never |
| 2        |                              |      |      |      |      |      |      |      |      |      |      |      |      |      |       |
| 1        | 1.50                         | 1.40 | 1.35 | 1.25 | 1.15 | 1.10 | 1.00 | 0.95 | 0.90 | 0.85 | 0.80 | 0.75 | 0.65 | 0.55 | 0.50  |
| 2        | 1.40                         | 1.30 | 1.25 | 1.15 | 1.10 | 1.00 | 0.95 | 0.90 | 0.85 | 0.80 | 0.75 | 0.70 | 0.60 | 0.55 | 0.50  |
| 3        | 1.30                         | 1.20 | 1.15 | 1.10 | 1.00 | 0.95 | 0.90 | 0.85 | 0.80 | 0.75 | 0.70 | 0.65 | 0.55 | 0.50 | 0.45  |
| 4        | 1.20                         | 1.15 | 1.05 | 1.00 | 0.95 | 0.90 | 0.85 | 0.80 | 0.75 | 0.70 | 0.65 | 0.55 | 0.50 | 0.45 | 0.40  |
| 5        | 1.15                         | 1.05 | 1.00 | 0.95 | 0.90 | 0.85 | 0.80 | 0.75 | 0.70 | 0.65 | 0.55 | 0.50 | 0.45 | 0.40 | 0.35  |
| 6        | 1.05                         | 1.00 | 0.95 | 0.90 | 0.85 | 0.80 | 0.75 | 0.70 | 0.65 | 0.60 | 0.55 | 0.50 | 0.45 | 0.40 | 0.35  |
| 7        | 1.00                         | 0.95 | 0.90 | 0.85 | 0.80 | 0.75 | 0.70 | 0.65 | 0.60 | 0.55 | 0.50 | 0.45 | 0.40 | 0.35 | 0.30  |
| 8        | 0.95                         | 0.90 | 0.85 | 0.80 | 0.75 | 0.70 | 0.65 | 0.60 | 0.55 | 0.50 | 0.45 | 0.40 | 0.35 | 0.30 | 0.25  |
| 9        | 0.90                         | 0.85 | 0.80 | 0.75 | 0.70 | 0.65 | 0.60 | 0.55 | 0.50 | 0.45 | 0.40 | 0.35 | 0.30 | 0.25 | 0.20  |
| 10       | 0.85                         | 0.80 | 0.75 | 0.70 | 0.65 | 0.60 | 0.55 | 0.50 | 0.45 | 0.40 | 0.35 | 0.30 | 0.25 | 0.20 | 0.20  |
| 11       | 0.80                         | 0.70 | 0.65 | 0.60 | 0.65 | 0.55 | 0.50 | 0.45 | 0.40 | 0.35 | 0.30 | 0.25 | 0.20 | 0.15 | 0.15  |
| 12       | 0.75                         | 0.65 | 0.60 | 0.55 | 0.50 | 0.50 | 0.45 | 0.40 | 0.35 | 0.30 | 0.25 | 0.20 | 0.20 | 0.15 | 0.10  |
| 13       | 0.65                         | 0.60 | 0.55 | 0.50 | 0.45 | 0.45 | 0.40 | 0.35 | 0.30 | 0.25 | 0.20 | 0.15 | 0.15 | 0.10 | 0.10  |
| 14       | 0.60                         | 0.55 | 0.50 | 0.45 | 0.40 | 0.35 | 0.35 | 0.30 | 0.25 | 0.20 | 0.15 | 0.10 | 0.10 | 0.10 | 0.05  |
| Never    | 0.50                         | 0.45 | 0.40 | 0.40 | 0.35 | 0.30 | 0.30 | 0.25 | 0.20 | 0.15 | 0.10 | 0.10 | 0.05 | 0.05 | 0.05  |

NB: values less than one indicate that the individual is risk averse, values equal to one indicate the individual is risk neutral, whilst values greater than one indicate the individual is risk loving (Abducted from Tanaka *et al.*, 2010).
